# Supplementary material for: Intra- and inter-isolate variation of ribosomal and protein-coding genes in Pleurotus: implications for molecular identification and phylogeny on fungal groups
Source: PubMed Central journal article supplement (PMC5485676; doi:10.1186/s12866-017-1046-y), 2017-06-26
Supplement: 12866_2017_1046_MOESM1_ESM.pdf [file 12866_2017_1046_MOESM1_ESM.pdf]

| <b>Strains<br/>Sites</b> | <b>102</b> | <b>123</b> | <b>151</b> | <b>170</b> | <b>220</b> | <b>414</b> | <b>415</b> | <b>556</b> |
|--------------------------|------------|------------|------------|------------|------------|------------|------------|------------|
| <b>P021</b>              | <b>T/C</b> | <b>T/-</b> | <b>T/A</b> | <b>A/-</b> | <b>T/A</b> | <b>C/-</b> | <b>T/-</b> | <b>T/C</b> |
| <b>P024</b>              | <b>T/C</b> | <b>T/-</b> | <b>T/A</b> | <b>A/-</b> | <b>T/A</b> | <b>C/-</b> | <b>T/-</b> | <b>T/C</b> |
| <b>P026</b>              | <b>T/C</b> | <b>T/-</b> | <b>T/A</b> | <b>A/-</b> | <b>T/A</b> | <b>C/-</b> | <b>T/-</b> | <b>T/C</b> |
| <b>P027</b>              | <b>T</b>   | <b>T</b>   | <b>A</b>   | <b>A</b>   | <b>A</b>   | <b>T/-</b> | <b>T</b>   | <b>C</b>   |
| <b>P055</b>              | <b>T/C</b> | <b>T/-</b> | <b>T/A</b> | <b>A/-</b> | <b>T/A</b> | <b>C/-</b> | <b>T/-</b> | <b>T/C</b> |
| <b>P057</b>              | <b>T/C</b> | <b>T/-</b> | <b>T/A</b> | <b>A/-</b> | <b>T/A</b> | <b>C/-</b> | <b>T/-</b> | <b>T/C</b> |
| <b>P058</b>              | <b>T/C</b> | <b>T/-</b> | <b>T/A</b> | <b>A/-</b> | <b>T/A</b> | <b>C/-</b> | <b>T/-</b> | <b>T/C</b> |
| <b>P069</b>              | <b>T/C</b> | <b>T/-</b> | <b>T/A</b> | <b>A/-</b> | <b>T/A</b> | <b>C/-</b> | <b>T/-</b> | <b>T/C</b> |
| <b>P079</b>              | <b>T/C</b> | <b>T/-</b> | <b>T/A</b> | <b>A/-</b> | <b>T/A</b> | <b>C/-</b> | <b>T/-</b> | <b>T/C</b> |
| <b>P082</b>              | <b>T/C</b> | <b>T/-</b> | <b>T/A</b> | <b>A/-</b> | <b>T/A</b> | <b>C/-</b> | <b>T/-</b> | <b>T/C</b> |
