# Supplementary material for: Intra- and inter-isolate variation of ribosomal and protein-coding genes in Pleurotus: implications for molecular identification and phylogeny on fungal groups
Source: PubMed Central journal article supplement (PMC5485676; doi:10.1186/s12866-017-1046-y), 2017-06-26
Supplement: 12866_2017_1046_MOESM3_ESM.pdf [file 12866_2017_1046_MOESM3_ESM.pdf]

| Types<br>Sites | 102 | 123 | 151 | 170 | 220 | 414 | 415 | 556 |
|----------------|-----|-----|-----|-----|-----|-----|-----|-----|
| 1              | T   | T   | A   | A   | A   | -   | -   | C   |
| 2              | T   | T   | A   | A   | A   | -   | -   | T   |
| 3              | T   | T   | A   | -   | T   | C   | T   | C   |
| 4              | T   | T   | A   | A   | T   | -   | -   | T   |
| 5              | T   | T   | A   | A   | A   | C   | T   | C   |
| 6              | T   | -   | T   | -   | T   | C   | T   | T   |
| 7              | C   | -   | T   | -   | T   | -   | -   | C   |
| 8              | C   | -   | T   | -   | T   | -   | -   | T   |
| 9              | C   | -   | T   | -   | T   | C   | T   | C   |
| 10             | C   | -   | T   | -   | A   | -   | -   | T   |
| 11             | C   | -   | T   | A   | A   | -   | -   | C   |
| 12             | C   | -   | T   | A   | A   | -   | -   | T   |
| 13             | C   | -   | T   | -   | A   | -   | -   | T   |
