# Supplementary material for: Intra- and inter-isolate variation of ribosomal and protein-coding genes in Pleurotus: implications for molecular identification and phylogeny on fungal groups
Source: PubMed Central journal article supplement (PMC5485676; doi:10.1186/s12866-017-1046-y), 2017-06-26
Supplement: 12866_2017_1046_MOESM4_ESM.pdf [file 12866_2017_1046_MOESM4_ESM.pdf]

| Strains<br>Sites | 87  | 186 | 213 | 306 | 413 | 417 | 450 | 484 | 531 | 572 |
|------------------|-----|-----|-----|-----|-----|-----|-----|-----|-----|-----|
| P038             | T/C | T   | T/C | T/C | T   | G/A | A   | T/C | C   | A   |
| P041             | T   | T/C | T   | T   | T   | A   | A   | C   | C   | T/A |
| P073             | T   | T   | T   | T   | T/C | A   | G/A | C   | T/C | T   |
