# Supplementary material for: Intra- and inter-isolate variation of ribosomal and protein-coding genes in Pleurotus: implications for molecular identification and phylogeny on fungal groups
Source: PubMed Central journal article supplement (PMC5485676; doi:10.1186/s12866-017-1046-y), 2017-06-26
Supplement: 12866_2017_1046_MOESM5_ESM.pdf [file 12866_2017_1046_MOESM5_ESM.pdf]

| <b>Strains</b> | <b>581</b> |
|----------------|------------|
| <b>Sites</b>   |            |
| <b>P145</b>    | -          |
| <b>P146</b>    | T          |
| <b>P147</b>    | T          |
