# Supplementary material for: Intra- and inter-isolate variation of ribosomal and protein-coding genes in Pleurotus: implications for molecular identification and phylogeny on fungal groups
Source: PubMed Central journal article supplement (PMC5485676; doi:10.1186/s12866-017-1046-y), 2017-06-26
Supplement: 12866_2017_1046_MOESM6_ESM.pdf [file 12866_2017_1046_MOESM6_ESM.pdf]

| Strains<br>Sites | 9   | 15  | 16  | 17  | 18  | 19  | 21 | 24  | 28  | 61  | 82  | 83  | 121 | 127 | 190 | 193 | 196 | 202 | 214 | 220 | 226 | 245 | 250 | 286 | 298 |
|------------------|-----|-----|-----|-----|-----|-----|----|-----|-----|-----|-----|-----|-----|-----|-----|-----|-----|-----|-----|-----|-----|-----|-----|-----|-----|
| P019             | C   | A   | A   | T   | T/C | G   | A  | A   | G   | G   | C   | T/C | A   | T   | G   | G   | C   | C   | T   | A   | C/A | A   | T/C | A   | T   |
| P027             | G/C | C   | G/A | T   | T/C | G/A | G  | G   | G   | G   | C/A | T/C | A   | T/C | G   | G   | C   | C   | T   | A   | C   | A   | C   | G   | T   |
| P028             | C   | C/A | A   | T/C | T   | G   | G  | C/A | G/A | G   | C/A | T   | G/A | T/C | G/A | G/A | C/A | C/A | T/G | T/A | A   | G/A | T/C | A   | T/C |
| P053             | C   | C/A | A   | T/C | T   | G   | G  | C/A | G/A | G/A | C/A | T   | G/A | T/C | G/A | G/A | C/A | C/A | T/G | T/A | A   | A   | T/C | A   | T/C |

| Strains<br>Sites | 319 | 322 | 325 | 328 | 331 | 337 | 352 | 364 | 367 | 376 | 379 | 394 | 397 | 400 | 412 | 415 | 421 | 467 | 480 | 486 | 490 | 493 | 508 | 523 | 526   | 532 |
|------------------|-----|-----|-----|-----|-----|-----|-----|-----|-----|-----|-----|-----|-----|-----|-----|-----|-----|-----|-----|-----|-----|-----|-----|-----|-------|-----|
| P019             | G   | A   | A   | C   | C   | A   | A   | C   | T   | G   | C   | T   | A   | C   | C   | G   | G/A | G/A | A   | T   | C   | T   | T/C | G   | T     | C   |
| P027             | G   | A   | A   | C/A | C   | A   | C   | C   | T   | G   | T   | C   | A   | T   | A   | A   | A   | A   | T/C | C   | T   | T   | G   | T   | C     |     |
| P028             | T/G | G/A | G/A | C   | T/C | T/A | G/A | T/C | T/C | G/A | C   | T/C | C/A | T   | T/A | G/A | G   | A   | A   | T   | T/C | T/C | T/C | G/A | T/C   | G/C |
| P053             | T/G | G/A | G/A | C   | T/C | T/A | G/A | T/C | T/C | G/A | C   | T/C | C/A | T   | T/A | G/A | G   | A   | G/A | T   | T/C | T   | T/C | G/A | G/T/C | T/C |

| Strains<br>Sites | 538 | 569 | 571 | 577 | 589 | 592 | 616 | 617 | 628 | 640 | 646 | 649 | 653 | 661 | 664 | 670 | 677 | 679 | 682 | 683 | 687 | 697 | 709 | 721 | 730 |
|------------------|-----|-----|-----|-----|-----|-----|-----|-----|-----|-----|-----|-----|-----|-----|-----|-----|-----|-----|-----|-----|-----|-----|-----|-----|-----|
| P019             | G   | A   | T/C | T/C | C   | T/G | T   | C   | C   | T/A | C   | A   | T/C | C/A | C   | C   | T/C | G   | C   | T/C | G/A | T   | C   | T   | G   |
| P027             | G   | G/A | C   | C   | C   | G   | T   | C   | C   | T   | C   | A   | C   | C   | C   | C   | T   | G   | C   | T   | A   | T   | C   | T   | G   |
| P028             | A   | A   | C   | T/C | T/C | G   | T/C | A   | C   | T/A | C   | A   | T/C | C/A | T/C | T/C | C   | G/A | T/G | T/C | A   | T/C | T/C | T/C | G/A |
| P053             | A   | A   | C   | T/C | C   | G   | T/C | A   | T/C | T/A | T/C | G/A | T/C | C/A | C   | C   | T/C | G   | T/C | C   | A   | T/C | T/C | T   | G   |

| Strains<br>Sites | 751 | 754 | 784 | 799 | 805 | 808 | 826 | 828 | 835 | 841 | 847 | 859 | 862 | 883 | 886 | 904 | 910 | 922 | 928 | 940 | 955 | 958 | 961 | 994 | 1000 |
|------------------|-----|-----|-----|-----|-----|-----|-----|-----|-----|-----|-----|-----|-----|-----|-----|-----|-----|-----|-----|-----|-----|-----|-----|-----|------|
| P019             | T/C | A   | A   | G   | G   | T/G | G   | A   | A   | C   | A   | T/C | C   | C   | A   | T/C | G   | C   | G   | T   | C   | G   | T   | C   | G    |
| P027             | T   | A   | A   | G   | G   | T   | G   | A   | A   | C   | A   | T   | T   | C   | A   | T   | G   | A   | G   | T   | T   | A   | C   | G   | A    |
| P028             | C   | T/A | A   | G/A | A   | T   | G   | A   | G/A | T/C | G/A | T   | T   | G   | G/A | T/C | G/A | C   | G/A | T/A | C   | G/A | T   | C   | G    |
| P053             | C   | A   | G/A | G/A | G/A | T   | G/A | G/A | G/A | T/C | G/A | T   | T   | T   | G/A | T/C | G/A | C   | G/A | T/A | C   | G/A | T   | C   | G    |
