# Supplementary material for: Intra- and inter-isolate variation of ribosomal and protein-coding genes in Pleurotus: implications for molecular identification and phylogeny on fungal groups
Source: PubMed Central journal article supplement (PMC5485676; doi:10.1186/s12866-017-1046-y), 2017-06-26
Supplement: 12866_2017_1046_MOESM7_ESM.pdf [file 12866_2017_1046_MOESM7_ESM.pdf]

| Strains<br>Sites | 8   | 9   | 10  | 11  | 18  | 19  | 20  | 45  | 200 | 230 | 275 | 284 | 291 | 302 | 320 | 350 | 378 | 416 | 492 | 566 | 593 | 712 | 830 | 848 | 908 | 917 |
|------------------|-----|-----|-----|-----|-----|-----|-----|-----|-----|-----|-----|-----|-----|-----|-----|-----|-----|-----|-----|-----|-----|-----|-----|-----|-----|-----|
| P003             | -   | -   | -   | -   | T   | C   | A   | T   | C   | A   | T   | C   | T/C | C   | G/A | T/C | T   | T/C | G/A | G/A | C   | T/A | G/A | C   | C   | A   |
| P077             | A/- | C/- | T/- | T/- | T/C | T/C | G/A | T/G | T/C | G/A | T/C | T/C | T/C | T/C | A   | T/C | T/C | T   | G   | A   | C   | T   | G   | T   | C   | A   |
| P078             | A/- | C/- | T/- | T/- | T/C | T/C | G/A | T/G | T/C | G/A | T   | T/C | T/C | T/C | A   | T/C | T/C | T   | G   | A   | C/A | T   | G   | T/C | C/A | G/A |
