# Supplementary material for: Intra- and inter-isolate variation of ribosomal and protein-coding genes in Pleurotus: implications for molecular identification and phylogeny on fungal groups
Source: PubMed Central journal article supplement (PMC5485676; doi:10.1186/s12866-017-1046-y), 2017-06-26
Supplement: 12866_2017_1046_MOESM8_ESM.pdf [file 12866_2017_1046_MOESM8_ESM.pdf]

| <b>Strains</b><br><b>Sites</b> | <b>15</b>  | <b>44</b>  | <b>105</b> | <b>108</b> | <b>467</b> | <b>686</b> | <b>848</b> | <b>864</b> |
|--------------------------------|------------|------------|------------|------------|------------|------------|------------|------------|
| <b>P145</b>                    | <b>T/C</b> | <b>T/C</b> | <b>T/C</b> | <b>G/A</b> | <b>T</b>   | <b>A</b>   | <b>T</b>   | <b>T/C</b> |
| <b>P146</b>                    | <b>T/C</b> | <b>T</b>   | <b>T/C</b> | <b>G/A</b> | <b>T</b>   | <b>A</b>   | <b>T</b>   | <b>T/C</b> |
| <b>P147</b>                    | <b>T/C</b> | <b>T</b>   | <b>T/C</b> | <b>G/A</b> | <b>T/C</b> | <b>G/A</b> | <b>T/C</b> | <b>T/C</b> |
