# Supplementary material for: Intra- and inter-isolate variation of ribosomal and protein-coding genes in Pleurotus: implications for molecular identification and phylogeny on fungal groups
Source: PubMed Central journal article supplement (PMC5485676; doi:10.1186/s12866-017-1046-y), 2017-06-26
Supplement: 12866_2017_1046_MOESM9_ESM.pdf [file 12866_2017_1046_MOESM9_ESM.pdf]

| Strains<br>Sites | 48  | 165 | 174 | 187 | 202 | 207 | 211 | 212 | 214 | 221 | 223 | 224 | 227 | 230 | 236 | 237 | 240 | 241 | 326 | 329 | 335 |
|------------------|-----|-----|-----|-----|-----|-----|-----|-----|-----|-----|-----|-----|-----|-----|-----|-----|-----|-----|-----|-----|-----|
| P019             | T/C | T/C | C   | A   | T/A | T/A | T/C | T   | T/G | T/C | C   | C   | A   | C   | A   | T   | T   | T/C | T/C | T/C | T/C |
| P027             | C   | C   | C   | A/C | T   | A   | T   | T/C | T   | C   | C   | C   | A   | C   | T/A | T   | T   | C   | T   | C   | C   |
| P053             | C   | T   | T/C | A   | T   | T   | T   | T   | G   | C   | G/C | G/C | G/A | C/- | T/A | T/C | T/G | C   | T   | T/C | G/C |
| Strains<br>Sites | 359 | 389 | 390 | 391 | 393 | 395 | 396 | 397 | 398 | 400 | 405 | 414 | 415 | 416 | 417 | 439 | 464 | 474 | 537 | 549 |     |
| P019             | C   | G/A | T/C | C/A | G/A | A/- | T/- | G/- | A/- | T/C | T/C | G/A | G/A | T/C | G   | C   | A   | T/C | C/A | T/C |     |
| P027             | C   | A   | C   | C   | A   | A   | T   | G   | A   | T   | T/C | A   | A   | T   | G   | C   | G/A | C   | A   | C   |     |
| P053             | T/C | A   | T/C | C   | G/A | A   | T   | G   | A   | T   | T   | A   | A   | T   | G/A | C/A | A   | C   | A   | C   |     |
