# Supplementary material for: Intra- and inter-isolate variation of ribosomal and protein-coding genes in Pleurotus: implications for molecular identification and phylogeny on fungal groups
Source: PubMed Central journal article supplement (PMC5485676; doi:10.1186/s12866-017-1046-y), 2017-06-26
Supplement: 12866_2017_1046_MOESM10_ESM.pdf [file 12866_2017_1046_MOESM10_ESM.pdf]

| Strains<br>Sites | 27  | 45  | 48  | 105 | 141 | 150 | 203 | 204 | 206 | 211 | 215 | 217 | 352 | 399 | 400 | 401 | 402 | 413 | 548 |
|------------------|-----|-----|-----|-----|-----|-----|-----|-----|-----|-----|-----|-----|-----|-----|-----|-----|-----|-----|-----|
| P003             | T   | T   | T/C | T   | T   | T/C | T/C | G   | A/T | A/G | T   | G   | T/C | C   | G   | A/C | T   | A   | T/C |
| P077             | T/C | T   | T   | T/C | T/C | C   | C   | C/G | A   | A   | T/C | A/G | C   | G/- | G/- | A/- | T/- | A/G | C   |
| P078             | T/C | T/C | T   | T/C | T/C | C   | C   | C/G | A   | A   | T/C | A/G | C   | G/- | G/- | A/- | T/- | A/G | C   |
