# Supplementary material for: Intra- and inter-isolate variation of ribosomal and protein-coding genes in Pleurotus: implications for molecular identification and phylogeny on fungal groups
Source: PubMed Central journal article supplement (PMC5485676; doi:10.1186/s12866-017-1046-y), 2017-06-26
Supplement: 12866_2017_1046_MOESM11_ESM.pdf [file 12866_2017_1046_MOESM11_ESM.pdf]

---

**Strains****Sites****189****214****223**

---

**P145****T/C****C****T/C****P146****C****A****T****P147****C****A****T**

---
